# Supplementary material
Source: publisher site journal article supplement (https://www.dovepress.com/article/328981)
Supplement: Supplementary file 1 [file get_supplementary_file.php]

**Appendix 1** Wateen Questionnaire

1. **What is your gender?**

- Male
- Female

1. **What is your age group in years?**

- 18-25
- 26-30
- 31-35
- 36-40
- 41-45
- 46-51
- >52

1. **Where do you live?**

- East province
- West province
- Riyadh
- North province
- South province

1. **Did you use the WATEEN Application before?**

- Yes
- No

1. **Do you know anyone who used the WATEEN Application?**

- Yes
- No

1. **What did you use the Wateen application for?**

- A blood donation request from the Wateen community
- Donation requests in social networks
- List and locations of blood banks
- Follow the donation record
- All of the above

1. **Did the Wateen application motivate you to donate blood?**

- Yes
- No

1. **Did the Wateen application educate you about the donation process?**

- Yes
- No

1. **From your personal experiences, did the Wateen application help you to find blood donors for your patient/family member/ beloved one?**

- Yes
- No

1. **Do you believe that the Wateen application reduced the gap between blood donors and the need for blood in hospitals?**

- Yes
- No

**If No, Why? …**

1. **Did you ever receive broadcasts or see a post or campaigning requesting blood donation through Wateen application on social media platform?**

- Yes
- No

1. **What was your most likely response when you received the blood donation request on Wateen application?**

- Nothing
- Share it with others
- It encouraged me to donate blood
- Other……..
